# Supplementary material for: DNA barcoding in the Southeast Pacific marine realm: Low coverage and geographic representation despite high diversity
Source: PubMed Central journal article supplement (PMC7769448; doi:10.1371/journal.pone.0244323), 2020-12-28

# DNA barcoding in the Southeast Pacific marine realm: low coverage and geographic representation despite high diversity

Jorge L. Ramirez<sup>1\*</sup>, Ulises Rosas-Puchuri<sup>2,3</sup>, Rosa Maria Cañedo<sup>1</sup>, Joanna Alfaro-Shigueto<sup>4,5</sup>,  
Patricia Ayon<sup>6</sup>, Eliana Zelada-Mázmela<sup>7</sup>, Raquel Siccha-Ramirez<sup>8</sup>, Ximena Velez-Zuazo<sup>2,9</sup>

<sup>1</sup>*Facultad de Ciencias Biológicas, Universidad Nacional Mayor de San Marcos, Lima, Peru*

<sup>2</sup>*Center for Conservation and Sustainability, Smithsonian Conservation Biology Institute, National  
Zoological Park, Washington DC, USA*

<sup>3</sup>*Department of Biological Sciences, George Washington University, Washington DC, USA*

<sup>4</sup>*Facultad de Biología Marina, Universidad Científica del Sur, Lima, Perú*

<sup>5</sup>*ProDelphinus, Lima, Peru*

<sup>6</sup>*Instituto del Mar del Peru, Callao, Peru*

<sup>7</sup>*Laboratorio de Genética, Fisiología y Reproducción, Facultad de Ciencias, Universidad Nacional del Santa,  
Chimbote, Peru*

<sup>8</sup>*Instituto del Mar del Perú, Laboratorio Costero de Tumbes, Zorritos, Peru*

<sup>9</sup>*Asociación Peruana para la Conservación de la Naturaleza, Lima, Peru*

\* e-mail: [jramirezma@unmsm.edu.pe](mailto:jramirezma@unmsm.edu.pe)

## S.1 Data processing

In the following, main data analyses are presented. Datasets were previously obtained with the OBC pipeline. Description of how OBC works out is shown in the main text.

### S.1.1 Setting up R requirements

We first load R libraries used throughout data processing:

```
library(dplyr) # data wrangling  
library(knitr) # data frame printing
```

Upon loading libraries, main datasets are also loaded. These datasets are located here.

```
bold = read.csv("bold.csv", stringsAsFactors = F) # BOLD-based dataset  
obis = read.csv("obis.csv", stringsAsFactors = F) # OBIS-based dataset  
bins = read.csv("bold_audited.tsv", sep = "\t", stringsAsFactors = F) # BIN-based dataset
```

### S.1.2 OBIS: species count per taxonomical group

Here we use the OBIS (Ocean Biogeographic Information System) dataset `obis` previously loaded. Then, we start obtaining metrics by group:

```
obis %>%  
  dplyr::group_by(group, valid_name) %>%  
  dplyr::summarise() %>% #getting unique values
```

```

dplyr::group_by(group) %>%
dplyr::summarise(n = length(valid_name)) %>%
dplyr::mutate(per = n*100/sum(n)) %>%
dplyr::arrange(-n) %>%
dplyr::ungroup() -> obis_group

knitr::kable(x = obis_group,
             digits = 2,
             align = 'l',
             caption = "Species count
by major taxonomical
groups for the OBIS dataset")

```

Table 1: Species count by major taxonomical groups for the OBIS dataset

| group          | n    | per   |
|----------------|------|-------|
| Invertebrates  | 3890 | 70.68 |
| Actinopterygii | 1439 | 26.14 |
| Elasmobranchii | 129  | 2.34  |
| Mammalia       | 40   | 0.73  |
| Reptilia       | 6    | 0.11  |

Obtaining metrics by country at group level:

```

obis %>%
dplyr::group_by(region, group, valid_name) %>%
dplyr::summarise() %>%
dplyr::group_by(region, group) %>%
dplyr::summarise(n = length(valid_name)) %>%
dplyr::mutate(per = n*100/sum(n)) %>%
dplyr::arrange(region, -n) %>%
dplyr::ungroup() %>%
knitr::kable(digits = 2,
             align = 'l',
             caption = "Species count by
countries and major
taxonomical groups for the OBIS dataset")

```

Table 2: Species count by countries and major taxonomical groups for the OBIS dataset

| region   | group          | n    | per   |
|----------|----------------|------|-------|
| Chile    | Invertebrates  | 2125 | 82.91 |
| Chile    | Actinopterygii | 381  | 14.87 |
| Chile    | Elasmobranchii | 33   | 1.29  |
| Chile    | Mammalia       | 21   | 0.82  |
| Chile    | Reptilia       | 3    | 0.12  |
| Colombia | Invertebrates  | 807  | 47.61 |
| Colombia | Actinopterygii | 797  | 47.02 |
| Colombia | Elasmobranchii | 67   | 3.95  |
| Colombia | Mammalia       | 19   | 1.12  |
| Colombia | Reptilia       | 5    | 0.29  |

| region  | group          | n   | per   |
|---------|----------------|-----|-------|
| Ecuador | Invertebrates  | 953 | 51.15 |
| Ecuador | Actinopterygii | 810 | 43.48 |
| Ecuador | Elasmobranchii | 66  | 3.54  |
| Ecuador | Mammalia       | 29  | 1.56  |
| Ecuador | Reptilia       | 5   | 0.27  |
| Peru    | Invertebrates  | 601 | 50.76 |
| Peru    | Actinopterygii | 506 | 42.74 |
| Peru    | Elasmobranchii | 56  | 4.73  |
| Peru    | Mammalia       | 16  | 1.35  |
| Peru    | Reptilia       | 5   | 0.42  |

### S.1.1.3 BOLD: basic metrics

Here we use the BOLD (Barcode of Life System) dataset `bold` previously loaded. Then, we start obtaining metrics by group:

```
obis_totalspps = length(unique(obis$valid_name))
bold_totalspps = length(unique(bold$valid_name))
```

Percentage of species having a record in BOLD:

```
bold_totalspps*100/obis_totalspps
```

```
## [1] 42.09666
```

Percentage of BOLD species that have public record inside the study area:

```
length(
  unique(
    bold["public_inside" == bold$availability, "valid_name"]
  )
)*100/obis_totalspps
```

```
## [1] 4.523983
```

Percentage of BOLD species that have public record outside the study area:

```
length(
  unique(
    bold["public_outside" == bold$availability, "valid_name"]
  )
)*100/obis_totalspps
```

```
## [1] 32.2311
```

Obtaining metrics by group

```
bold %>%
  dplyr::group_by(group, valid_name) %>%
  dplyr::summarise() %>% #getting unique values
  dplyr::group_by(group) %>%
  dplyr::summarise(n = length(valid_name)) %>%
  dplyr::mutate(per = n*100/sum(n)) %>%
  dplyr::arrange(-n) %>%
  dplyr::ungroup() -> bold_group
```

```
knitr::kable(x = bold_group,
```

```

digits = 2,
align = 'l',
caption = "Species count
by major taxonomical
groups for the BOLD dataset")

```

Table 3: Species count by major taxonomical groups for the BOLD dataset

| group          | n    | per   |
|----------------|------|-------|
| Invertebrates  | 1196 | 51.62 |
| Actinopterygii | 978  | 42.21 |
| Elasmobranchii | 102  | 4.40  |
| Mammalia       | 35   | 1.51  |
| Reptilia       | 6    | 0.26  |

Obtaining metrics by country at group level:

```

bold %>%
  dplyr::group_by(region, group, valid_name) %>%
  dplyr::summarise() %>%
  dplyr::group_by(region, group) %>%
  dplyr::summarise(n = length(valid_name)) %>%
  dplyr::mutate(per = n*100/sum(n)) %>%
  dplyr::arrange(region, -n) %>%
  dplyr::ungroup() %>%
  knitr::kable(digits = 2,
               align = 'l',
               caption = "Species count by
countries and major
taxonomical groups for the BOLD dataset" )

```

Table 4: Species count by countries and major taxonomical groups for the BOLD dataset

| region   | group          | n   | per   |
|----------|----------------|-----|-------|
| Chile    | Invertebrates  | 683 | 67.03 |
| Chile    | Actinopterygii | 287 | 28.16 |
| Chile    | Elasmobranchii | 26  | 2.55  |
| Chile    | Mammalia       | 20  | 1.96  |
| Chile    | Reptilia       | 3   | 0.29  |
| Colombia | Actinopterygii | 558 | 58.74 |
| Colombia | Invertebrates  | 312 | 32.84 |
| Colombia | Elasmobranchii | 56  | 5.89  |
| Colombia | Mammalia       | 19  | 2.00  |
| Colombia | Reptilia       | 5   | 0.53  |
| Ecuador  | Actinopterygii | 588 | 59.21 |
| Ecuador  | Invertebrates  | 322 | 32.43 |
| Ecuador  | Elasmobranchii | 53  | 5.34  |
| Ecuador  | Mammalia       | 25  | 2.52  |
| Ecuador  | Reptilia       | 5   | 0.50  |
| Peru     | Actinopterygii | 366 | 59.22 |
| Peru     | Invertebrates  | 190 | 30.74 |

| region | group          | n  | per  |
|--------|----------------|----|------|
| Peru   | Elasmobranchii | 42 | 6.80 |
| Peru   | Mammalia       | 15 | 2.43 |
| Peru   | Reptilia       | 5  | 0.81 |

Obtaining metrics by country at subgroup level for Invertebrates

```
bold %>%
  dplyr::filter(grepl("Invertebrates", group)) %>%
  dplyr::group_by(region, subgroup, valid_name) %>%
  dplyr::summarise() %>%
  dplyr::group_by(region, subgroup) %>%
  dplyr::summarise(n = length(valid_name)) %>%
  dplyr::mutate(per = n*100/sum(n)) %>%
  dplyr::arrange(region, -n) %>%
  dplyr::ungroup() %>%
  knitr::kable(digits = 2,
               align = 'l',
               caption = "Species count
by countries and Invertebrates
subgroups for the BOLD dataset" )
```

Table 5: Species count by countries and Invertebrates subgroups for the BOLD dataset

| region   | subgroup      | n   | per   |
|----------|---------------|-----|-------|
| Chile    | Arthropoda    | 234 | 34.26 |
| Chile    | Mollusca      | 115 | 16.84 |
| Chile    | Echinodermata | 106 | 15.52 |
| Chile    | Cnidaria      | 98  | 14.35 |
| Chile    | Annelida      | 80  | 11.71 |
| Chile    | Porifera      | 21  | 3.07  |
| Chile    | Chaetognatha  | 13  | 1.90  |
| Chile    | Bryozoa       | 10  | 1.46  |
| Chile    | Nemertea      | 4   | 0.59  |
| Chile    | Brachiopoda   | 1   | 0.15  |
| Chile    | Nematoda      | 1   | 0.15  |
| Colombia | Mollusca      | 167 | 53.53 |
| Colombia | Arthropoda    | 67  | 21.47 |
| Colombia | Echinodermata | 45  | 14.42 |
| Colombia | Cnidaria      | 27  | 8.65  |
| Colombia | Annelida      | 4   | 1.28  |
| Colombia | Porifera      | 2   | 0.64  |
| Ecuador  | Arthropoda    | 145 | 45.03 |
| Ecuador  | Mollusca      | 58  | 18.01 |
| Ecuador  | Echinodermata | 46  | 14.29 |
| Ecuador  | Cnidaria      | 43  | 13.35 |
| Ecuador  | Annelida      | 24  | 7.45  |
| Ecuador  | Bryozoa       | 2   | 0.62  |
| Ecuador  | Chaetognatha  | 2   | 0.62  |
| Ecuador  | Porifera      | 2   | 0.62  |
| Peru     | Arthropoda    | 67  | 35.26 |
| Peru     | Mollusca      | 46  | 24.21 |

| region | subgroup      | n  | per   |
|--------|---------------|----|-------|
| Peru   | Echinodermata | 31 | 16.32 |
| Peru   | Cnidaria      | 29 | 15.26 |
| Peru   | Annelida      | 16 | 8.42  |
| Peru   | Brachiopoda   | 1  | 0.53  |

### S.1.4 BIN: basic metrics

Here we use the BIN (Barcode Index Number) dataset `bins` previously loaded. Then, we start obtaining metrics of BIN-based classification per taxonomical groups:

```
bins %>%
  dplyr::group_by(Group, Classification, Species) %>%
  dplyr::summarise() %>%
  dplyr::group_by(Group, Classification) %>%
  dplyr::summarise(n = length(Classification)) %>%
  dplyr::mutate(per = n*100/sum(n)) %>%
  dplyr::ungroup() %>%
  knitr::kable(digits = 2,
               align = 'l',
               caption = "Composition of BIN-based
                           classification by
                           major taxonomical groups")
```

Table 6: Composition of BIN-based classification by major taxonomical groups

| Group          | Classification | n   | per   |
|----------------|----------------|-----|-------|
| Actinopterygii | A              | 148 | 17.92 |
| Actinopterygii | B              | 61  | 7.38  |
| Actinopterygii | C              | 57  | 6.90  |
| Actinopterygii | D              | 331 | 40.07 |
| Actinopterygii | E*             | 73  | 8.84  |
| Actinopterygii | E**            | 120 | 14.53 |
| Actinopterygii | F              | 36  | 4.36  |
| Elasmobranchii | A              | 31  | 36.47 |
| Elasmobranchii | B              | 5   | 5.88  |
| Elasmobranchii | C              | 6   | 7.06  |
| Elasmobranchii | D              | 23  | 27.06 |
| Elasmobranchii | E*             | 7   | 8.24  |
| Elasmobranchii | E**            | 8   | 9.41  |
| Elasmobranchii | F              | 5   | 5.88  |
| Invertebrates  | A              | 12  | 1.31  |
| Invertebrates  | B              | 24  | 2.61  |
| Invertebrates  | C              | 53  | 5.77  |
| Invertebrates  | D              | 433 | 47.12 |
| Invertebrates  | E*             | 5   | 0.54  |
| Invertebrates  | E**            | 29  | 3.16  |
| Invertebrates  | F              | 363 | 39.50 |
| Mammalia       | D              | 26  | 83.87 |
| Mammalia       | F              | 5   | 16.13 |
| Reptilia       | A              | 4   | 66.67 |
| Reptilia       | C              | 1   | 16.67 |

| Group    | Classification | n | per   |
|----------|----------------|---|-------|
| Reptilia | F              | 1 | 16.67 |

Collapsing Actinopterygii and Elasmobranchii as fishes:

```
bins$Group <- gsub("(Actinopterygii|Elasmobranchii)", "Fishes", bins$Group)

bins %>%
  dplyr::group_by(Group, Classification, Species) %>%
  dplyr::summarise() %>%
  dplyr::group_by(Group, Classification) %>%
  dplyr::summarise(n = length(Classification)) %>%
  dplyr::mutate(per = n*100/sum(n)) %>%
  dplyr::ungroup() %>%
  knitr::kable(digits = 2,
               align = 'l',
               caption = "Same as Table 6 expect that
both Actinopterygii and Elasmobranchii
are collasped within the Fishes group")
```

Table 7: Same as Table 6 expect that both Actinopterygii and Elasmobranchii are collapsed within the Fishes group

| Group         | Classification | n   | per   |
|---------------|----------------|-----|-------|
| Fishes        | A              | 179 | 19.65 |
| Fishes        | B              | 66  | 7.24  |
| Fishes        | C              | 63  | 6.92  |
| Fishes        | D              | 354 | 38.86 |
| Fishes        | E*             | 80  | 8.78  |
| Fishes        | E**            | 128 | 14.05 |
| Fishes        | F              | 41  | 4.50  |
| Invertebrates | A              | 12  | 1.31  |
| Invertebrates | B              | 24  | 2.61  |
| Invertebrates | C              | 53  | 5.77  |
| Invertebrates | D              | 433 | 47.12 |
| Invertebrates | E*             | 5   | 0.54  |
| Invertebrates | E**            | 29  | 3.16  |
| Invertebrates | F              | 363 | 39.50 |
| Mammalia      | D              | 26  | 83.87 |
| Mammalia      | F              | 5   | 16.13 |
| Reptilia      | A              | 4   | 66.67 |
| Reptilia      | C              | 1   | 16.67 |
| Reptilia      | F              | 1   | 16.67 |

### S.1.5 OBIS and BOLD: comparative table

Rough comparison

```
colnames(bold_group)[2:3] <- c("n1", "per1")

dplyr::left_join(obis_group, bold_group, by = "group") %>%
  dplyr::select(group, n, n1) %>%
```

```
dplyr::mutate(per = n1*100/n) %>%
dplyr::arrange(-per) %>%
knitr::kable(digits = 2,
              align = 'l',
              caption = "Comparison between both
OBIS and BOLD datasets")
```

Table 8: Comparison between both OBIS and BOLD datasets

| group          | n    | n1   | per    |
|----------------|------|------|--------|
| Reptilia       | 6    | 6    | 100.00 |
| Mammalia       | 40   | 35   | 87.50  |
| Elasmobranchii | 129  | 102  | 79.07  |
| Actinopterygii | 1439 | 978  | 67.96  |
| Invertebrates  | 3890 | 1196 | 30.75  |

## S.2 Data visualization at Unix terminal

Make sure OBc is installed.

### S.2.1 Upset plot

Stripes (-l) and blocks (-b) options are explicitly stated to keep consistency in each plot

For entire dataset of bold

```
upsetplot -i data/bold.csv\
          -l "Colombia,Ecuador,Peru,Chile"\
          -b "Invertebrates,Actinopterygii,Elasmobranchii,Mammalia,Reptilia"
```

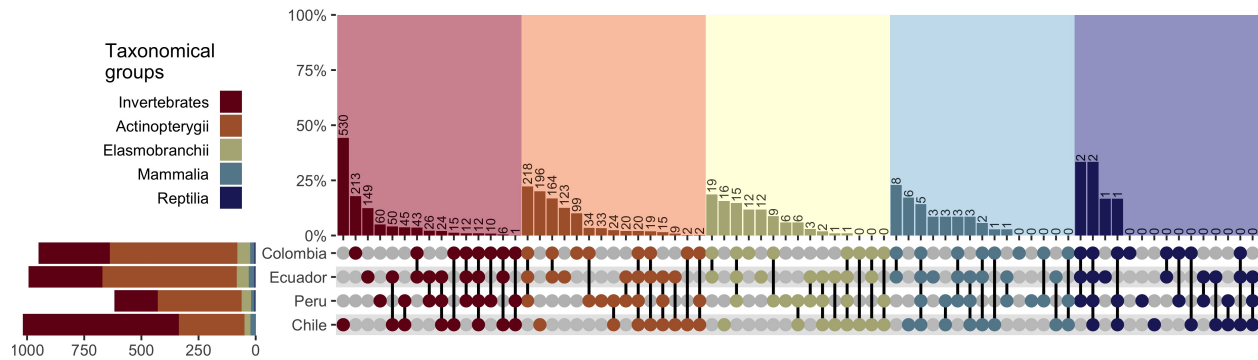

For entire dataset of obis

```
upsetplot -i data/obis.csv\
          -l "Colombia,Ecuador,Peru,Chile"\
          -b "Invertebrates,Actinopterygii,Elasmobranchii,Mammalia,Reptilia"
```



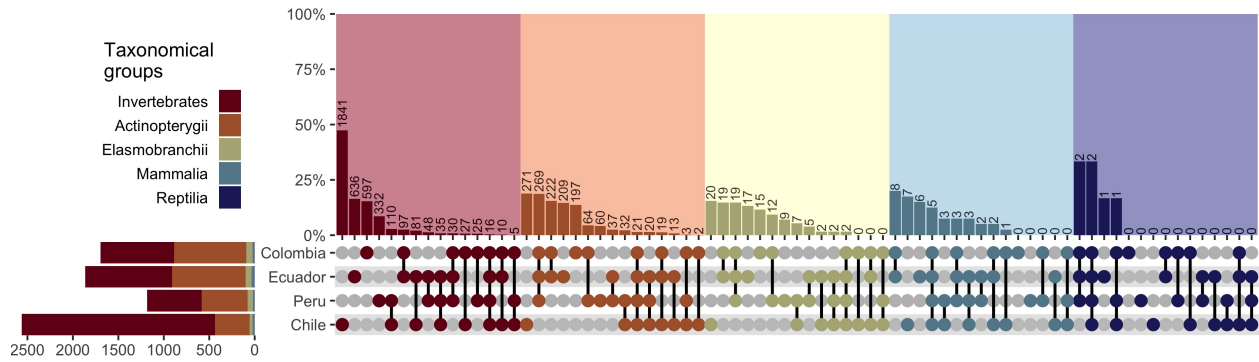

Only for species with public BOLD record and distributed inside the study area

*# filter records by availability*

```
cat data/bold.csv | grep "public_inside" > data/bold_public_inside.csv
```

```
upsetplot -i data/bold_public_inside.csv\  
-l "Colombia,Ecuador,Peru,Chile"\  
-b "Invertebrates,Actinopterygii,Elasmobranchii,Mammalia,Reptilia"
```

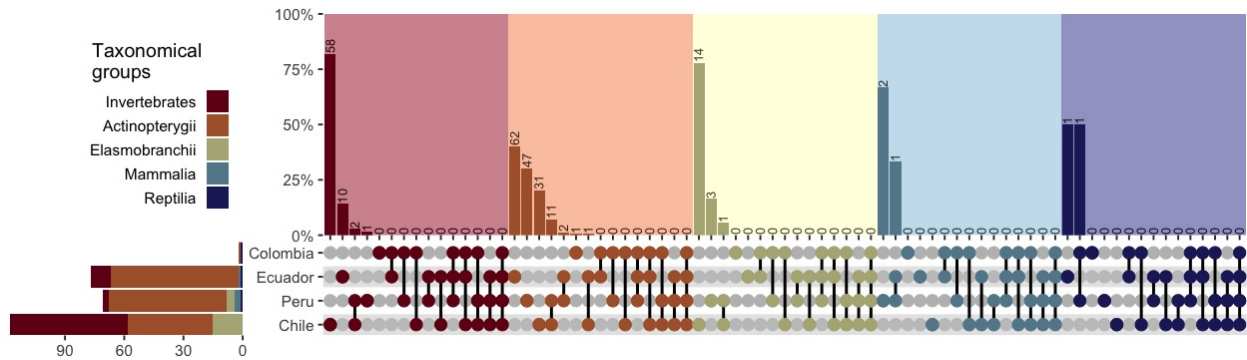

Supplement: pone.0244323.s001.pdf [file pone.0244323.s001.pdf]
